# Supplementary material for: ETS Exposure and PAH Body Burden in Nonsmoking Italian Adults
Source: MDPI journal article supplement (doi:10.3390/ijerph15061156), 2018-06-01
Supplement: s1 [file s1]

**Supplementary Table 1.** Estimates of regression models using urinary PAHs as dependent variables. Beta-coefficients ( $\beta$ ) of COT-U are shown regardless of the significance level, whereas only  $\beta$  values below the 0.10 significance level are illustrated for the other covariates.

| Fixed variables | PAH                                             | 1-OHPYR  | Nap      | Acy     | Ace      | Flu      | Phe     | Ant     | Flt     | Pyr     | Chr      |
|-----------------|-------------------------------------------------|----------|----------|---------|----------|----------|---------|---------|---------|---------|----------|
|                 | Sample size                                     | 287      | 294      | 313     | 305      | 313      | 301     | 306     | 313     | 311     | 310      |
|                 | Box & Cox $\lambda$ transformation <sup>a</sup> | 0.06     | -0.34    | -0.28   | -0.08    | 0.27     | -0.75   | 0.71    | 0.11    | 0.14    | -0.09    |
|                 | R <sup>2</sup>                                  | 0.36**   | 0.33**   | 0.14**  | 0.14*    | 0.23**   | 0.22**  | 0.48**  | 0.11*   | 0.08    | 0.23**   |
|                 | $\beta$                                         | $\beta$  | $\beta$  | $\beta$ | $\beta$  | $\beta$  | $\beta$ | $\beta$ | $\beta$ | $\beta$ | $\beta$  |
|                 | Sampling day                                    | 0.007**  |          | 0.002** | -0.002** |          |         | 0.009** | ns      | ns      | 0.005**  |
|                 | Day 0                                           |          | -0.056** |         |          | ns       | 0.008*  | ns      |         |         |          |
|                 | Day 1                                           |          | ns       |         |          | 0.095**  | 0.029** | ns      |         |         |          |
|                 | Day 2                                           |          | -0.040** |         |          | ns       | ns      | ns      |         |         |          |
|                 | SWI exposure (ref. level 1)                     |          |          |         |          |          |         |         |         |         |          |
|                 | level 2                                         | ns       | -0.061*  | -0.179* | ns       | ns       | ns      | ns      | ns      | ns      | -0.295** |
|                 | level 3                                         | ns       | ns       | ns      | ns       | 0.152*   | ns      | ns      | ns      | ns      | -0.255** |
|                 | level 4 (highest)                               | ns       | ns       | ns      | ns       | 0.175**  | ns      | ns      | ns      | ns      | ns       |
|                 | Gender (ref. male)                              | ns       | ns       | ns      | ns       | ns       | 0.018*  | ns      | ns      | ns      | 0.219**  |
|                 | Age, years                                      | -0.011** | ns       | ns      | ns       | ns       | ns      | ns      | ns      | ns      | ns       |
|                 | Education level (ref. low)                      | 0.243*   | ns       | ns      | ns       | ns       | ns      | ns      | ns      | ns      | ns       |
|                 | Citizenship (ref. Italian)                      | ns       | 0.109**  | ns      | ns       | 0.126*   | 0.053** | ns      | 0.189** | 0.150** | 0.284*   |
|                 | BMI, kg/cm2                                     | ns       | ns       | ns      | ns       | ns       | ns      | ns      | ns      | ns      | ns       |
|                 | Cotinine, $\mu$ g/L                             | 0.043**  | 0.002    | -0.003  | -0.003   | 0.003    | -0.000  | 0.015   | 0.009   | 0.004   | -0.015   |
|                 | Creatinine, g/L                                 | 0.680**  | -0.049** | ns      | ns       | -0.059** | 0.028** | 0.093*  | ns      | ns      | ns       |
|                 | Residence zone (ref. rural)                     |          |          |         |          |          |         |         |         |         |          |
|                 | industrial                                      | ns       | 0.205**  | 0.378** | ns       | ns       | ns      | ns      | ns      | ns      | ns       |
|                 | urban                                           | ns       | 0.076*   | ns      | ns       | -0.226** | ns      | ns      | ns      | ns      | ns       |

|                       |                                         |        |         |        |          |         |          |         |        |    |    |
|-----------------------|-----------------------------------------|--------|---------|--------|----------|---------|----------|---------|--------|----|----|
|                       | mixed                                   | ns     | 0.072*  | ns     | ns       | -0.130* | ns       | ns      | ns     | ns | ns |
|                       | Temperature, °C                         | ns     | ns      | ns     | -0.031** | ns      | -0.003** | ns      | 0.010* | ns | ns |
|                       | Precipitation, mm                       | ns     | ns      | 0.026* | ns       | ns      | ns       | -0.021* | ns     | ns | ns |
|                       | Outdoor traffic exposure (ref. low)     |        |         |        |          |         |          |         |        |    |    |
|                       | medium                                  | ns     | ns      | ns     | ns       | 0.127** | ns       | 0.109*  | ns     | ns | ns |
|                       | high                                    | ns     | ns      | 0.227* | ns       | ns      | ns       | ns      | ns     | ns | ns |
|                       | Heating exposure as NOx µg/m3           | ns     | ns      | 0.010* | ns       | 0.009** | ns       | ns      | ns     | ns | ns |
|                       | Time spent at home, h                   | ns     | ns      | ns     | ns       | ns      | ns       | ns      | ns     | ns | ns |
|                       | Residential distance from major road, m | ns     | ns      | ns     | ns       | ns      | ns       | ns      | ns     | ns | ns |
|                       | Occupational exposure to PAH            | ns     | ns      | ns     | ns       | ns      |          | ns      | ns     | ns | ns |
| PAH-specific variates | Mold on the residence wall              | ns     | 0.049*  | 0.168* | ns       | 0.117*  | 0.018*   | 0.199** | 0.109* | ns | ns |
|                       | Medication <sup>b</sup>                 |        |         | ns     | 0.179*   |         |          |         |        |    |    |
|                       | Nutritional supplement <sup>b</sup>     |        |         |        |          |         | ns       |         | 0.098* | ns | ns |
|                       | Char-grilled food <sup>b</sup>          | ns     |         | ns     | ns       |         |          | -0.114* |        |    |    |
|                       | Tuna <sup>b</sup>                       |        |         | ns     | 0.360**  |         |          |         |        |    |    |
|                       | Paint use <sup>b</sup>                  |        |         |        |          |         | ns       | 0.304*  |        |    | ns |
|                       | Coffee <sup>b</sup>                     | 0.267* |         |        |          |         |          | ns      |        | ns | ns |
|                       | wine <sup>b</sup>                       |        | 0.042** |        |          |         |          |         |        |    |    |
|                       | Whole cereals <sup>b</sup>              |        |         |        |          |         |          |         |        | ns | ns |
|                       | fish <sup>b</sup>                       |        |         |        |          |         |          |         |        |    | ns |

ns = not significant

\*\* p-value <0.05

\*p-value <0.1

<sup>a</sup> Logarithmic transformation if  $\lambda$  of the Box-Cox transformation equals to zero.

<sup>b</sup> Previous week
